# Supplementary material for: Donor–acceptor type blends composed of black phosphorus and C60 for solid-state optical limiters
Source: Royal Society of Chemistry journal article supplement (doi:10.1039/c7cc07937k), 2017-12-07
Supplement: c7cc07937k1.pdf [file c7cc07937k1.pdf]

Supporting Information-CC-COM-10-2017-007937(2017-11-15)

Donor-Acceptor Type Blends Composed of Black Phosphorus and C<sub>60</sub> for Solid-State Optical Limiters

Makai Shi<sup>a</sup>, Shutong Huang, Ningning Dong<sup>b,c</sup>, Zhiwei Liu<sup>a</sup>, Fan Gan,<sup>a</sup> Jun Wang<sup>\*\*b,d</sup>, Yu Chen<sup>\*a</sup>

<sup>a</sup>Key Laboratory for Advanced Materials, Institute of Applied Chemistry, School of Chemistry and Molecular Engineering, East China University of Science and Technology, 130 Meilong Road, Shanghai 200237, China.

<sup>b</sup>Key Laboratory of Materials for High-Power Laser, Shanghai Institute of Optics and Fine Mechanics, CAS, Shanghai 201800, China.

<sup>d</sup>State Key Laboratory of High Field Laser Physics, Shanghai Institute of Optics and Fine Mechanics Chinese Academy of Sciences, Shanghai 201800, China

**Table 1.** Linear and NLO data for the PMMA-based samples. E<sub>I</sub>: Input pulse laser energy; T<sub>0</sub>: linear transmittance; α<sub>0</sub>: linear absorption coefficient; β<sub>eff</sub>: nonlinear coefficient; Imχ<sup>(3)</sup>: imaginary third-order susceptibility. FOM: figure of merit.

| Laser               | E <sub>I</sub><br>(μJ) | sample                        | T <sub>0</sub> % | α <sub>0</sub><br>(cm <sup>-1</sup> ) | β <sub>eff</sub><br>(cm GW <sup>-1</sup> ) | Imχ <sup>(3)</sup><br>(×10 <sup>-12</sup> esu) | FOM<br>(×10 <sup>-15</sup> esu cm) |
|---------------------|------------------------|-------------------------------|------------------|---------------------------------------|--------------------------------------------|------------------------------------------------|------------------------------------|
| 532 nm<br>2Hz, 6 ns | 10                     | BP                            | 53.68            | 75.87                                 | -36.84                                     | -15.73                                         | 207.33                             |
|                     |                        | C <sub>60</sub>               | 78.64            | 124.16                                | -                                          | -                                              | -                                  |
|                     |                        | BP:C <sub>60</sub>            | 44.35            | 113.94                                | -                                          | -                                              | -                                  |
|                     |                        | BP:C <sub>60</sub> (annealed) | 61.72            | 60.71                                 | 87.32                                      | 37.29                                          | 614.23                             |
| 532 nm<br>2Hz, 6 ns | 20                     | BP                            | 53.68            | 75.87                                 | -30.64                                     | -13.08                                         | 172.40                             |
|                     |                        | C <sub>60</sub>               | 78.64            | 124.16                                | -                                          | -                                              | -                                  |
|                     |                        | BP:C <sub>60</sub>            | 44.35            | 113.94                                | -25.42                                     | -10.85                                         | 95.23                              |
|                     |                        | BP:C <sub>60</sub> (annealed) | 61.72            | 60.71                                 | 96.7                                       | 41.29                                          | 680.12                             |
| 532 nm<br>2Hz, 6 ns | 40                     | BP                            | 53.68            | 75.87                                 | -18.5                                      | -7.90                                          | 104.13                             |
|                     |                        | C <sub>60</sub>               | 78.64            | 124.16                                | -                                          | -                                              | -                                  |
|                     |                        | BP:C <sub>60</sub>            | 44.35            | 113.94                                | -18.31                                     | -7.82                                          | 68.63                              |
|                     |                        | BP:C <sub>60</sub> (annealed) | 61.72            | 60.71                                 | 98.7                                       | 42.14                                          | 694.12                             |
| 532 nm              | 120                    | BP                            | 53.68            | 75.87                                 | -15.21                                     | -6.49                                          | 85.54                              |
|                     |                        | C <sub>60</sub>               | 78.64            | 124.16                                | 75.46                                      | 32.22                                          | 259.50                             |

|                                    |     |                                       |       |        |        |        |         |
|------------------------------------|-----|---------------------------------------|-------|--------|--------|--------|---------|
|                                    |     | BP:C <sub>60</sub>                    | 44.35 | 113.94 | -10.61 | -4.53  | 39.76   |
|                                    |     | BP:C <sub>60</sub> (annealed)         | 61.72 | 60.71  | 128.62 | 54.93  | 904.79  |
| <b>532 nm</b><br><b>2Hz, 6 ns</b>  | 250 | BP                                    | 53.68 | 75.869 | -7.27  | -3.10  | 40.86   |
|                                    |     | C <sub>60</sub>                       | 78.64 | 124.16 | 134.54 | 57.45  | 462.71  |
|                                    |     | BP:C <sub>60</sub>                    | 44.35 | 113.94 | 23.15  | 9.88   | 86.71   |
|                                    |     | BP:C <sub>60</sub> (annealed)         | 61.72 | 60.71  | 174.07 | 74.33  | 1224.35 |
| <b>532 nm</b><br><b>2Hz, 6 ns</b>  | 400 | BP                                    | 53.68 | 75.87  | -5.33  | -2.28  | 30.05   |
|                                    |     | C <sub>60</sub>                       | 78.64 | 124.16 | 162.79 | 69.51  | 559.84  |
|                                    |     | BP:C <sub>60</sub>                    | 44.35 | 113.94 | 39.39  | 16.82  | 147.62  |
|                                    |     | BP:C <sub>60</sub> (annealed)         | 61.72 | 60.71  | 241.73 | 103.22 | 1700.21 |
| <b>532 nm</b><br><b>10Hz, 6 ns</b> | 400 | BP:C <sub>60</sub>                    | 65.15 | 5.11   | 1.43   | 0.49   | 9.59    |
|                                    |     | BP:C <sub>60</sub> (solvent annealed) | 60.41 | 4.29   | 4.62   | 1.59   | 370.63  |
